# Supplementary material for: Dendrochemistry in Public Health: A Case Study in North Carolina, USA
Source: MDPI journal article supplement (doi:10.3390/f13111767), 2022-10-27
Supplement: s1 [file s1]

Table S1. Tree data.

| Tree # | Radius (cm) <sup>a</sup> | # of rings | Approximate pith date <sup>b</sup> | # of decades |
|--------|--------------------------|------------|------------------------------------|--------------|
| 1      | 25.5                     | 84         | 1937                               | 8            |
| 2      | 18.8                     | 52         | 1969                               | 5            |
| 3      | missing                  | missing    | 1970s                              | 5            |
| 4      | 26.5                     | 47         | 1974                               | 5            |
| 5      | 17.7                     | 77         | 1944                               | 8            |
| 6      | 15.5                     | 82         | 1939                               | 8            |
| 7      | 23.0                     | 140        | 1871                               | 14           |
| 8      | 23.0                     | 47         | 1974                               | 5            |
| 9      | 17.5                     | 78         | 1943                               | 8            |
| 10     | missing                  | missing    | 1980s                              | 4            |
| 11     | 25.0                     | 42         | 1979                               | 4            |
| 12     | 23.5                     | 49         | 1972                               | 5            |
| 13     | 26.0                     | 50         | 1971                               | 5            |
| 14     | 23.7                     | 53         | 1968                               | 5            |
| 15     | 21.5                     | 46         | 1975                               | 5            |
| 16     | 22.0                     | 47         | 1974                               | 5            |
| 17     | 23.5                     | 46         | 1975                               | 5            |
| 18     | missing                  | missing    | 1970s                              | 5            |
| 19     | 16.5                     | 100        | 1921                               | 10           |
| 20     | 19.5                     | 83         | 1938                               | 9            |
| 21     | 16.0                     | 38         | 1983                               | 4            |
| 22     | 17.0                     | 35         | 1986                               | 4            |
| 23     | missing                  | missing    | 1980s                              | 4            |
| 24     | missing                  | missing    | 1980s                              | 4            |
| 25     | 21.0                     | 38         | 1983                               | 4            |
| 26     | missing                  | missing    | 1920s                              | 10           |
| 27     | 16.5                     | 80         | 1931                               | 8            |
| 28     | 14.0                     | 74         | 1947                               | 7            |

<sup>a</sup> Inside bark<sup>b</sup> Coring date of January, 2022, so outermost ring = 2021

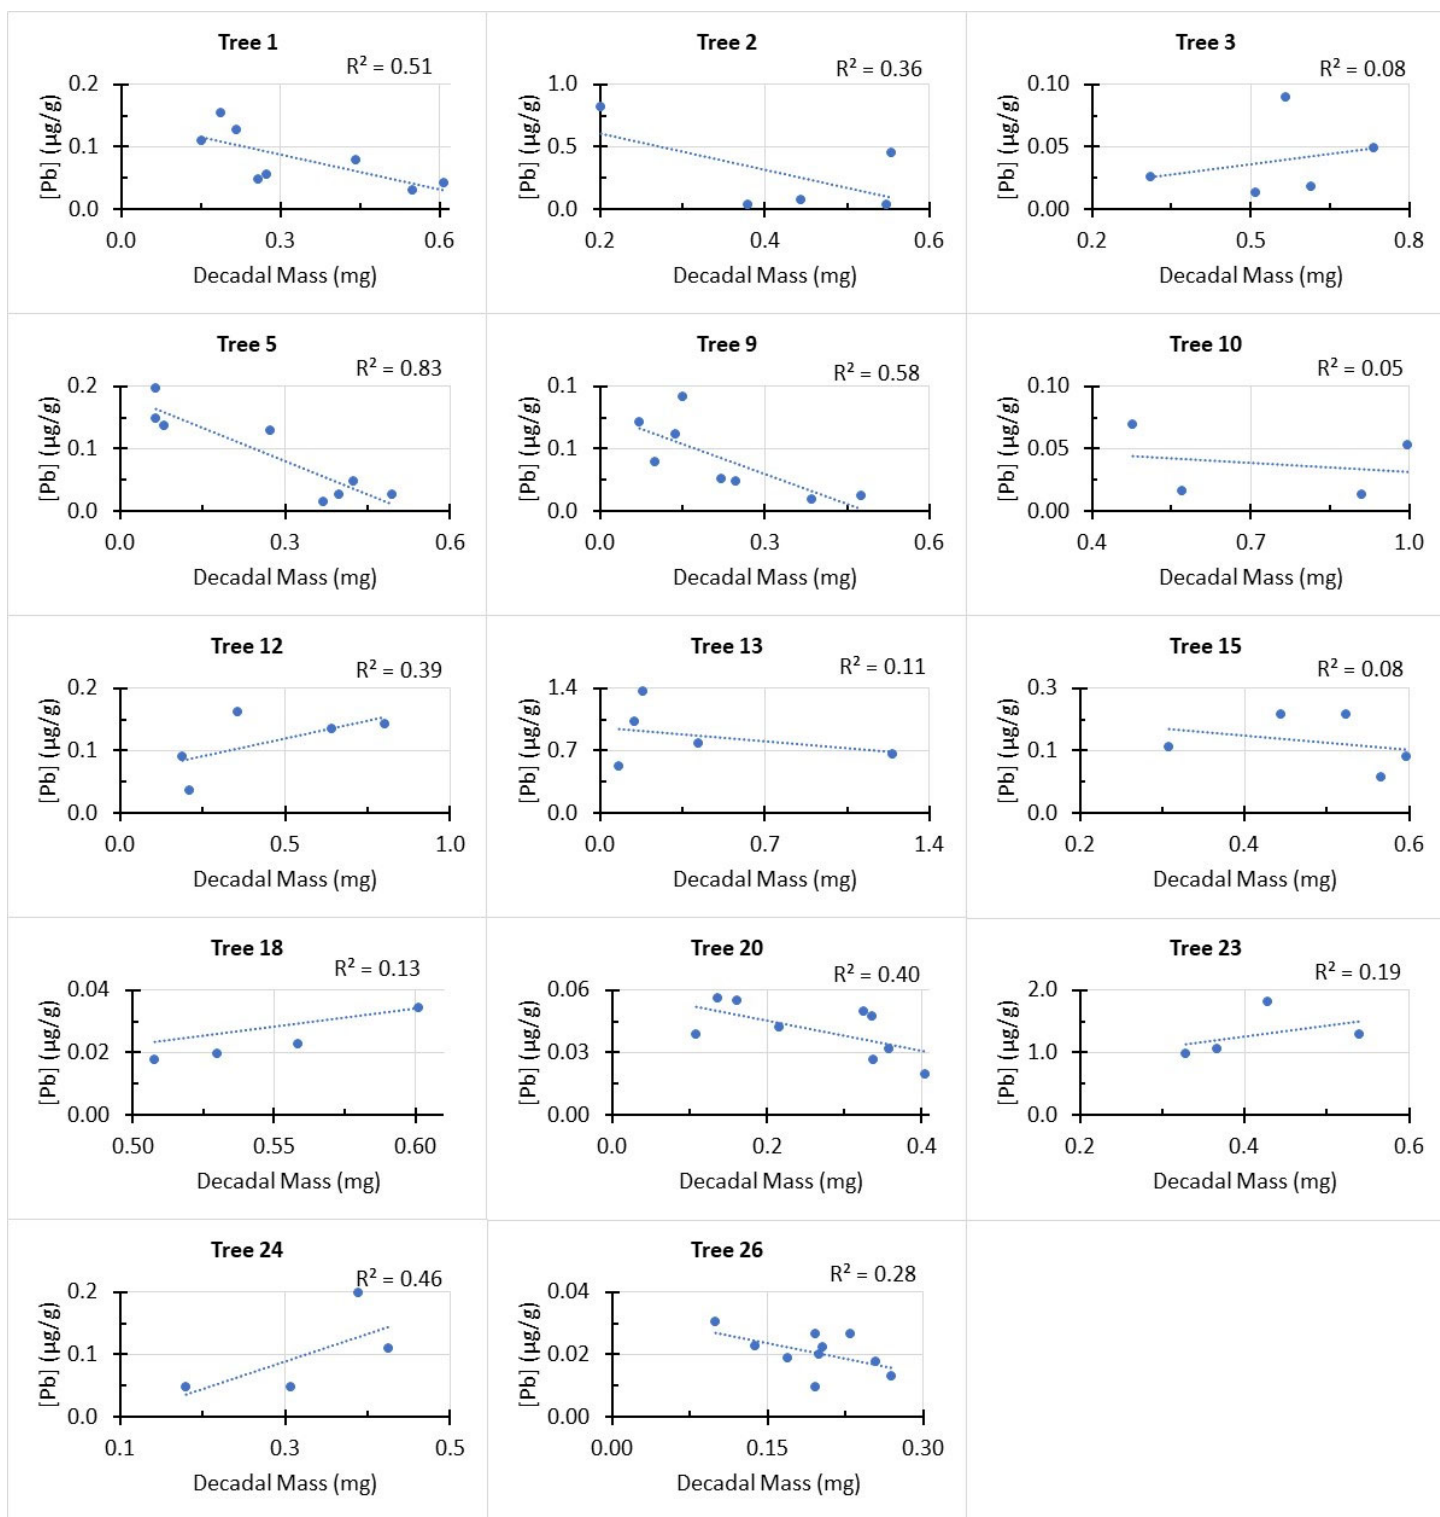

Figure S1. Bivariate scatter plots of lead (Pb) content by wood mass for each tree measured.
